# Supplementary material for: Fabricating multifunctional nanoparticle membranes by a fast layer-by-layer Langmuir–Blodgett process: application in lithium–sulfur batteries
Source: Royal Society of Chemistry journal article supplement (doi:10.1039/c6ta06018h), 2016-01-01
Supplement: c6ta06018h1.pdf [file c6ta06018h1.pdf]

## SUPPORTING INFORMATION

### **Fabricating Multifunctional Nanoparticle Membranes by a Fast Layer-by-Layer Langmuir-Blodgett Process: Application in Lithium-sulfur Batteries**

*Mun Sek Kim<sup>a,c,†</sup>, Lin Ma<sup>b,†</sup>, Snehashis Choudhury<sup>a</sup>, Surya S. Moganty<sup>d</sup>, Shuya Wei<sup>a</sup>, and  
Lynden A. Archer<sup>a,\*</sup>*

<sup>a</sup>Department of Chemical and Biomolecular Engineering and <sup>b</sup>Department of Materials  
Science & Engineering, Cornell University, Ithaca, New York 14853-5201, United States.

<sup>c</sup>Center for Energy Convergence, Korea Institute of Science and Technology,  
Hwarangno 14-gil 5, Seongbuk-gu, Seoul, 02792, Republic of Korea.

<sup>d</sup>NOHMs Technologies, 1200 Ridgeway Ave. Suite 110, Rochester, NY, 14615, United  
States.

<sup>†</sup> These authors contributed equally to this work.

\*Tel: 607 254-8825. E-mail: [laa25@cornell.edu](mailto:laa25@cornell.edu)

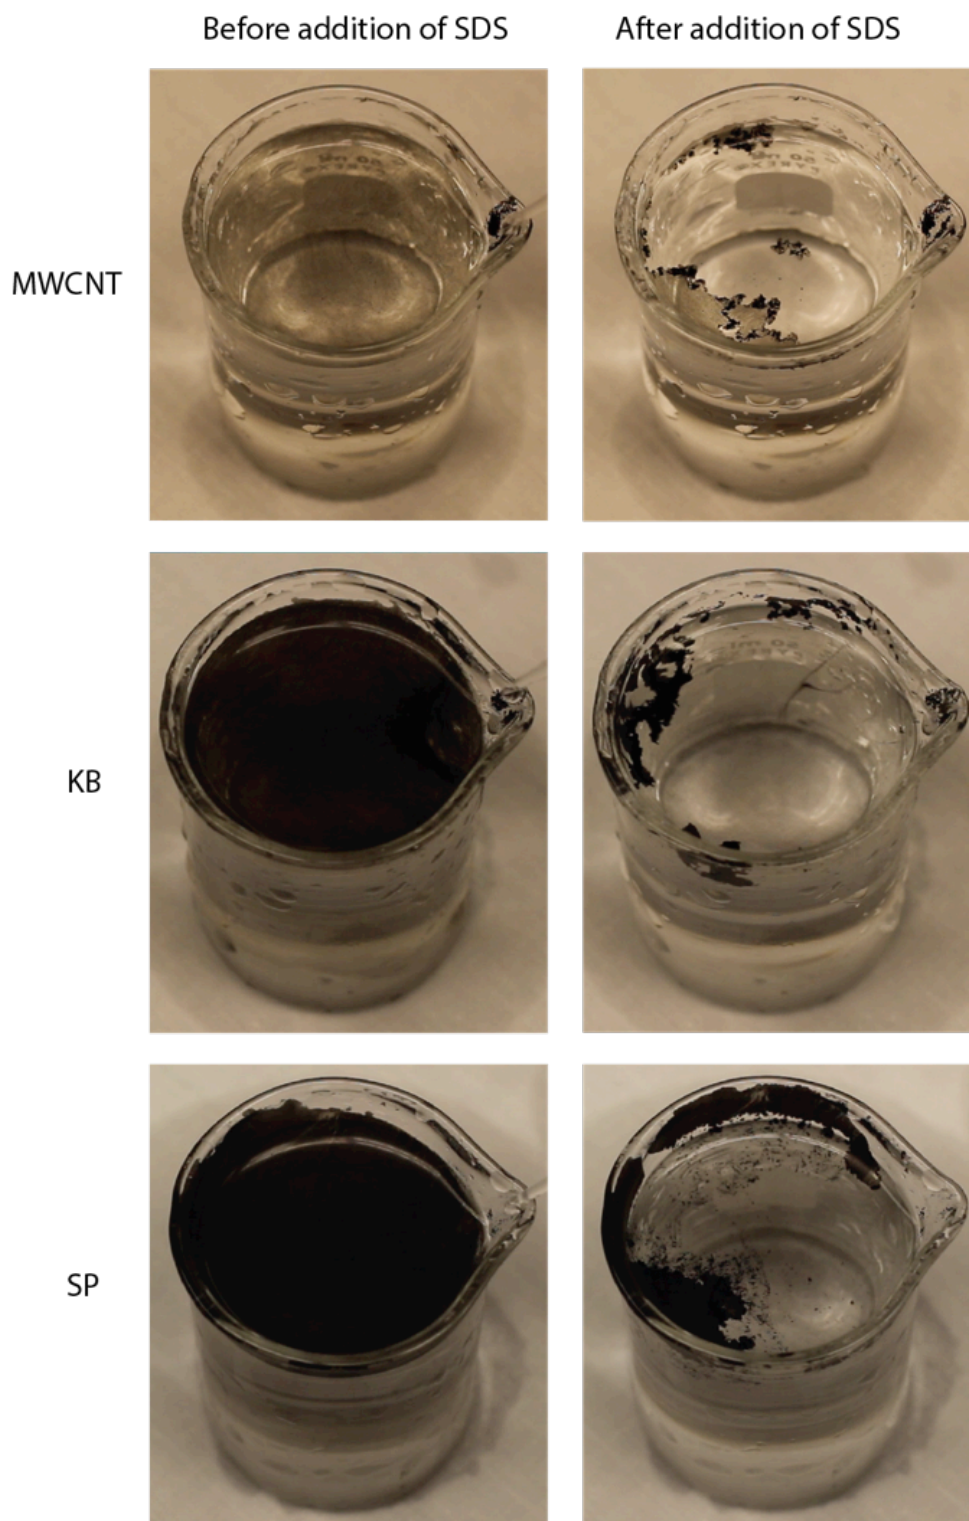

**Fig. S1: Collapsing self-assembled LB film in the presence of SDS surfactant.** The self-assembled MWCNT, KB, and SP films are formed at the surface of water using LBS coating method, and images of the films before and after adding a one-drop of SDS surfactant at the neck of the beaker are shown.

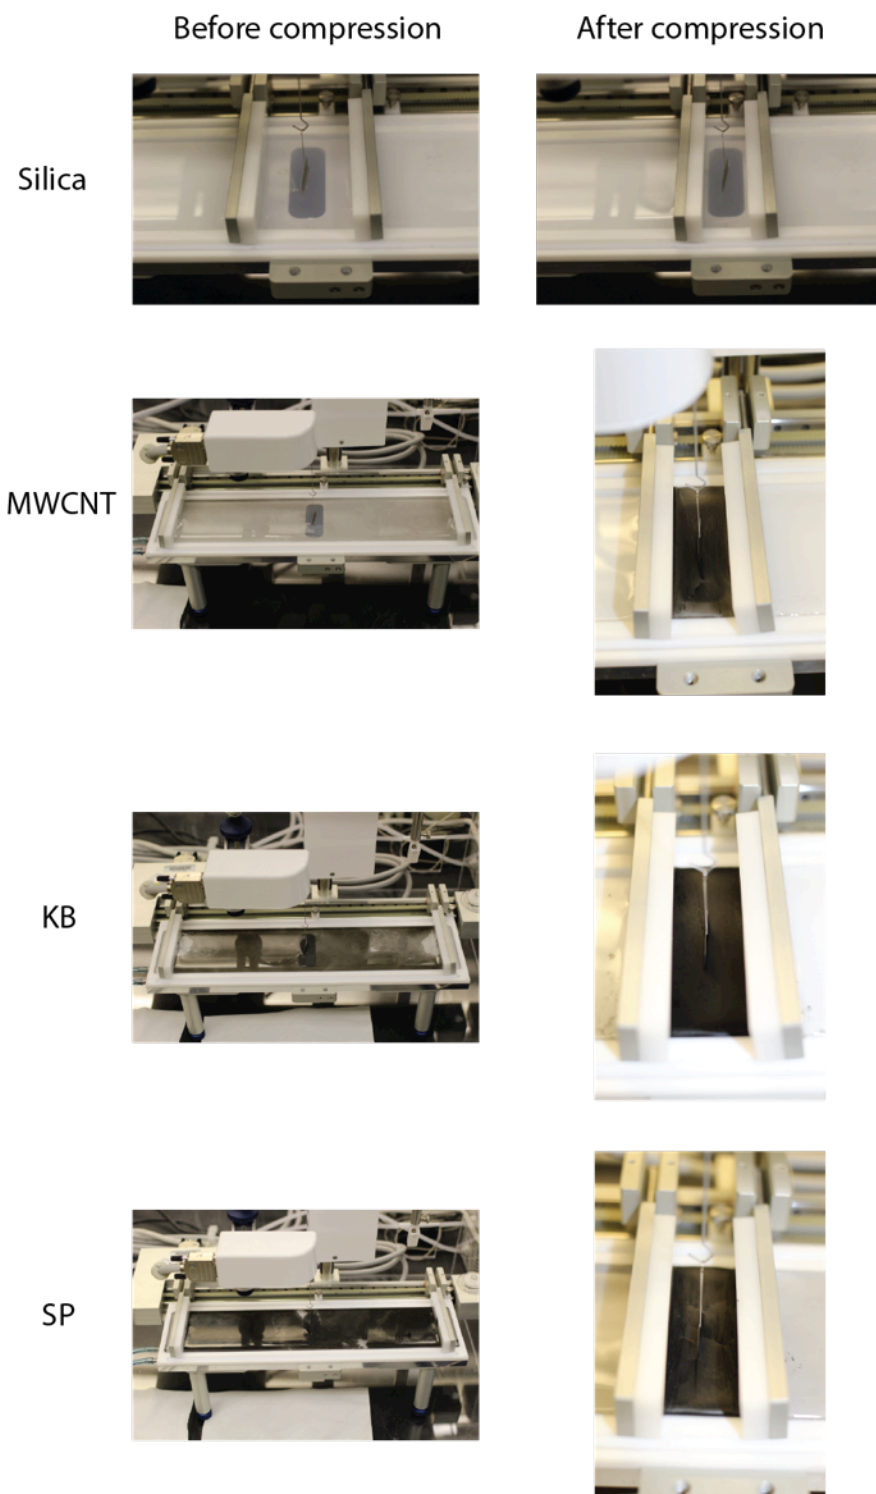

**Fig. S2: Langmuir-Blodgett trough experiment for surface pressure measurements.** Images of compressing silica nanospheres, MWCNT, KB, and SP are shown. Note that no materials are lost during the compression of the LB films, and folding of the films is observed instead of particles sinking.

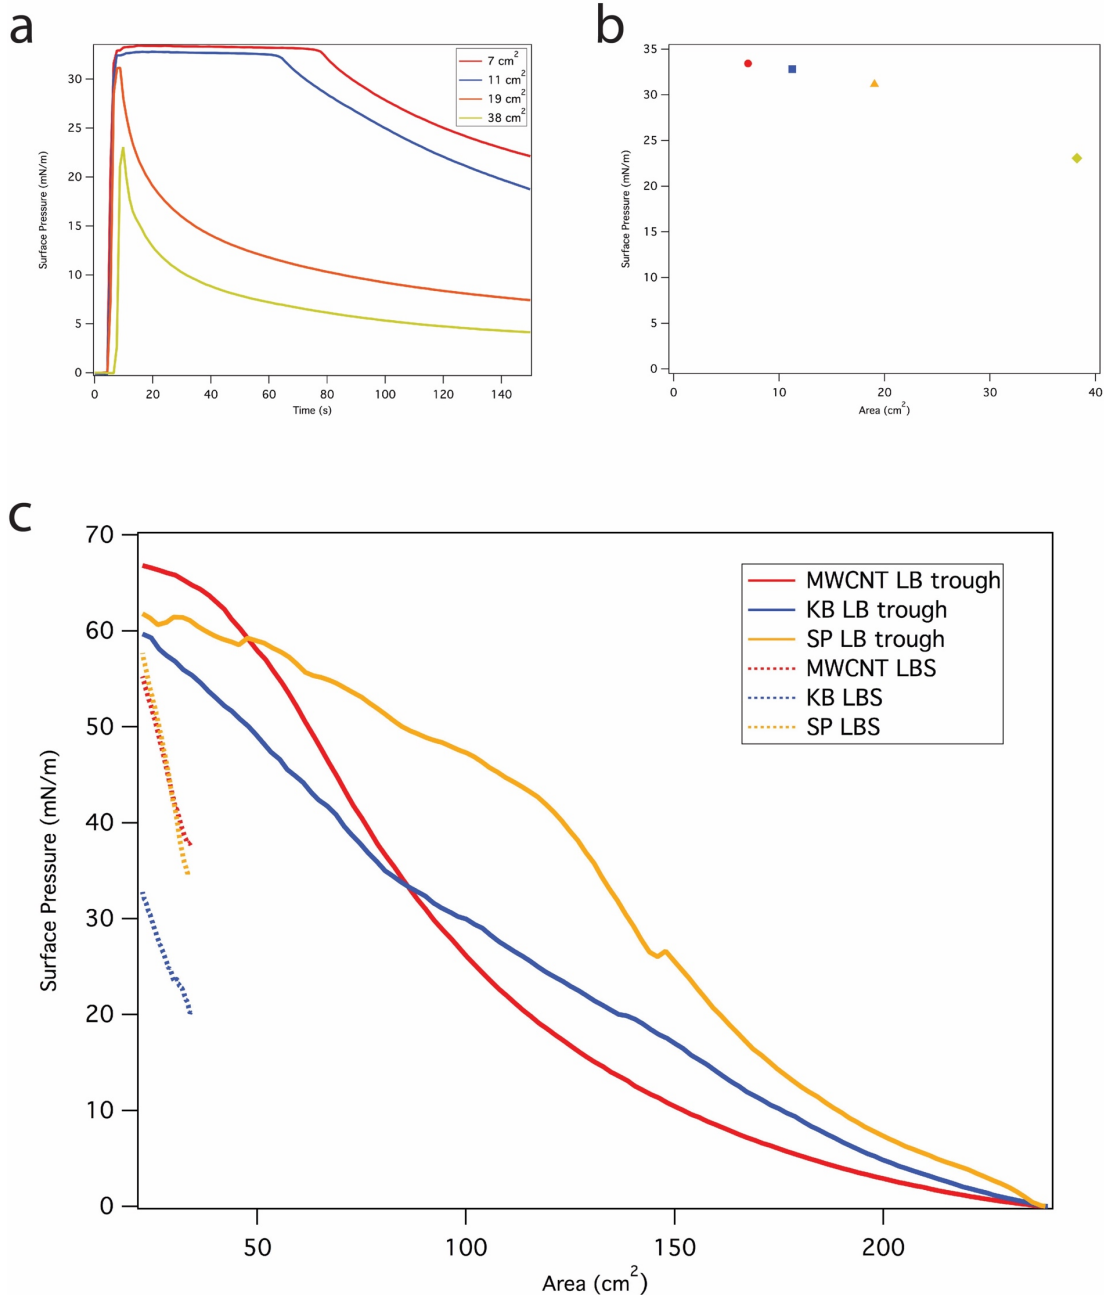

**Fig. S3: SDS surfactant and carbon particles surface pressure profiles.** (a) Surface pressures of SDS surfactant versus time for the surface area of 7 cm<sup>2</sup>, 11 cm<sup>2</sup>, 19 cm<sup>2</sup>, and 38 cm<sup>2</sup>. (b) Maximum surface pressures exerted by the surfactant for the surface area of 7 cm<sup>2</sup>, 11 cm<sup>2</sup>, 19 cm<sup>2</sup>, and 38 cm<sup>2</sup>. (c) MWCNT, KB, and SP surface pressure profiles obtained from conventional LB trough and LBS methods.

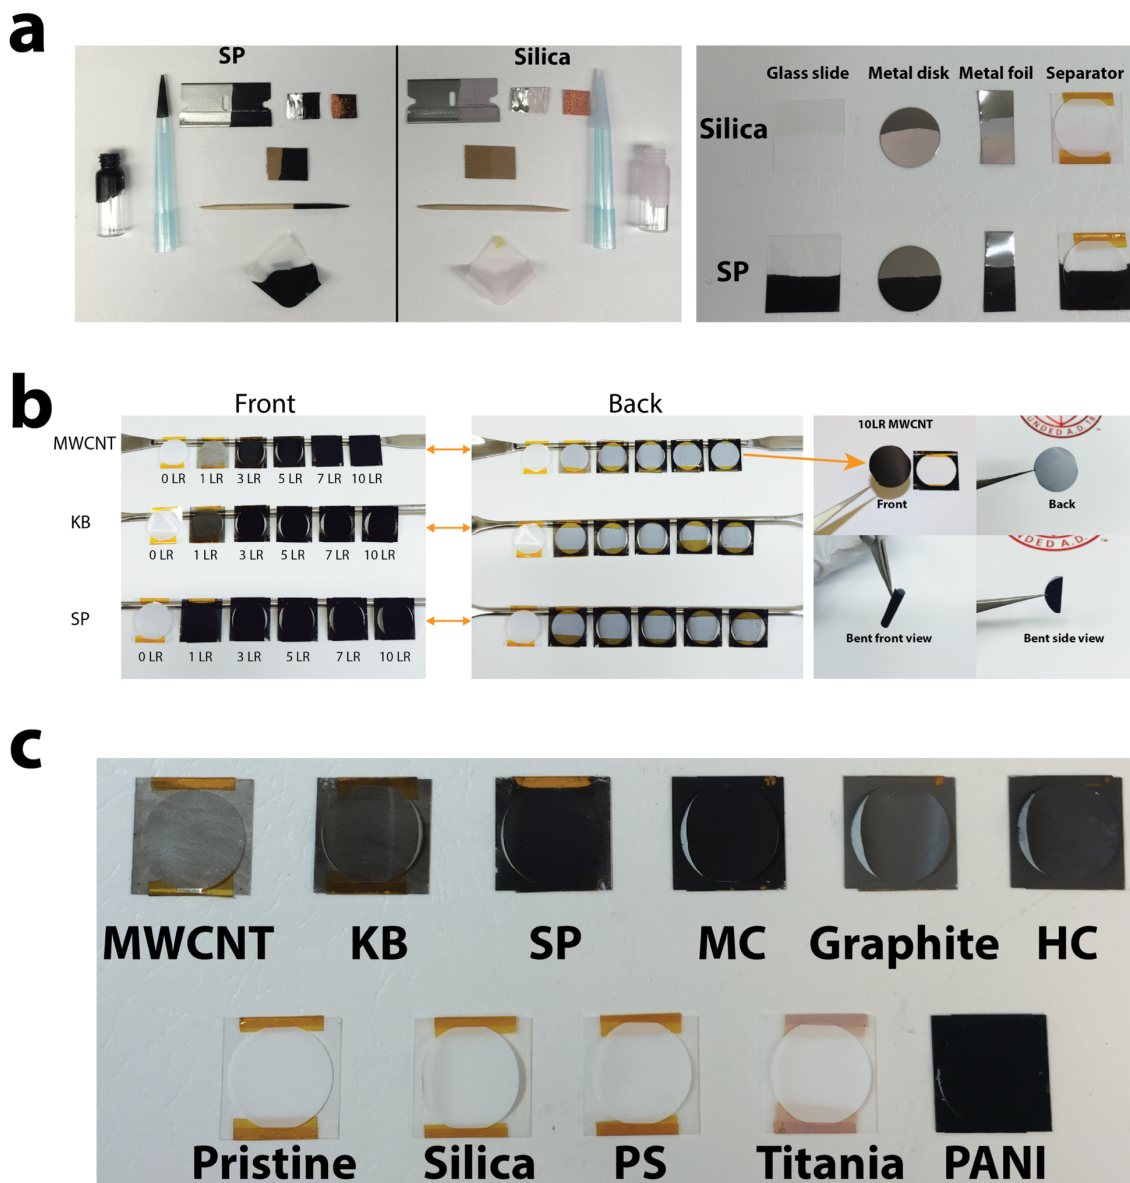

**Fig. S4: Demonstrating versatility of the LB coating methods.** (a) Images of fluorescent  $1\mu\text{m}$  silica nanosphere and SP carbon coatings on various nonuniform (left) and uniform (right) substrates using LBS coating method. Note that fluorescent silicon and SP carbon are used to enhance the visibility of the coatings on the substrates. (b) Demonstration of single-sided and layer-by-layer separator coating (left) and mechanical strength of the single component coating (right). (c) Images of single coating layer of various materials on the separator – Multi-walled carbon nanotube (MWCNT), Ketjen Black carbon (KB), Super P carbon (SP), Microporous carbon (MC), Graphite, Hard carbon (HC),  $350\text{ nm}$  silica nanospheres,  $1\mu\text{m}$  polystyrene spheres (PS), titania nanopowder, and polyaniline (PANI).

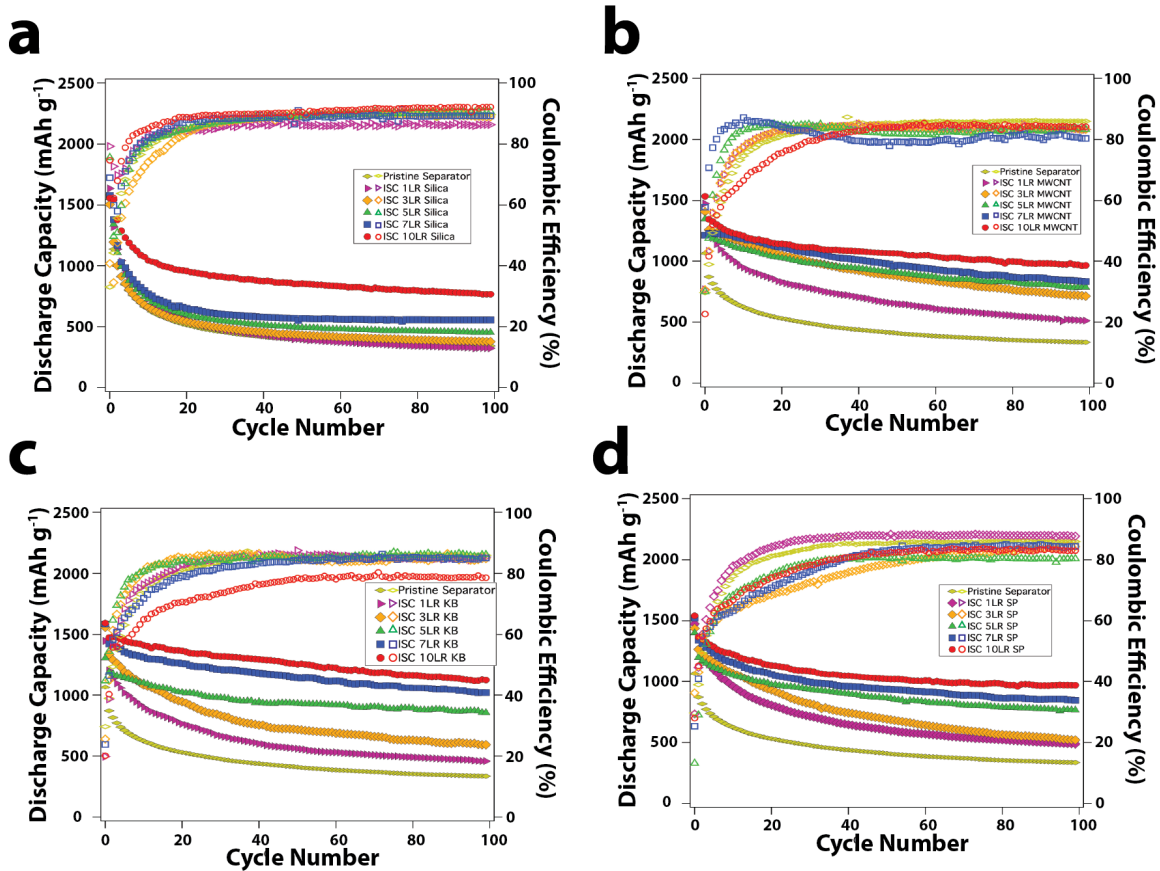

**Fig. S5: Electrochemical performances of KB and SP carbon coated separators with ISC.** Electrochemical performance of zero to ten coating layers of (a) Silica nanospheres, (b) MWCNT, (c) KB and (d) SP coated separators Li-S cells at 0.2C for the silica and 0.5 C for the carbon coatings.

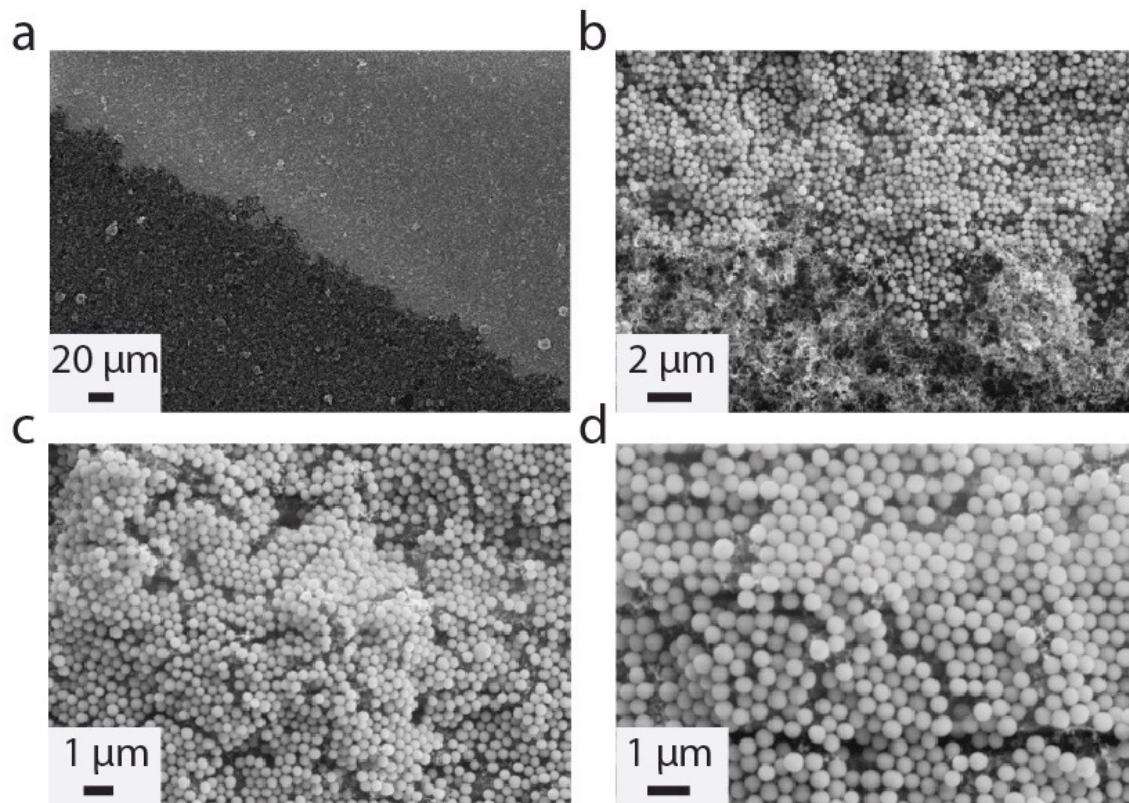

**Fig. S6: SEM images of a monolayer of silica nanospheres coated on MWCNT-SP layer.** (a) Silica-SP layer boundary region, (b) wide-view, and (c) close-view. A monolayer of silica coating on top of the SP-MWCNT layer (c, d).

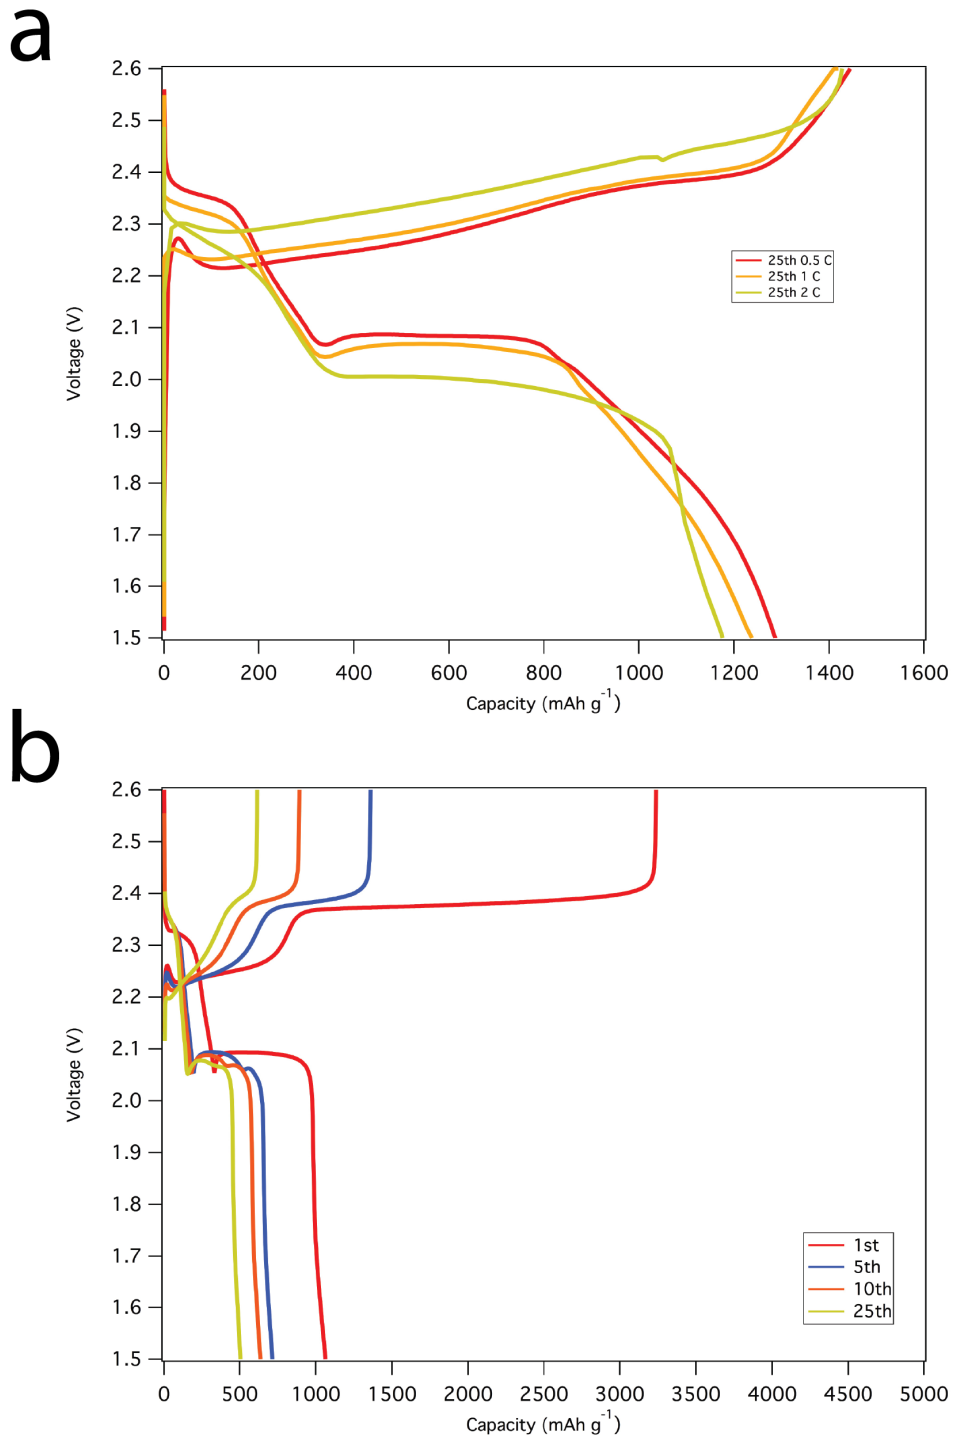

**Fig. S7: Voltage profiles of Li-S cells with/without clip coated separator and ISC.** (a) Discharge-charge voltage profiles of pristine Li anode Li-S cell with the clip coated separator and ISC at 25<sup>th</sup> cycle for various C rates. (b) Discharge-charge voltage profiles of pristine Li anode Li-S cell with the pristine separator and ISC at 0.5 C for various cycles.



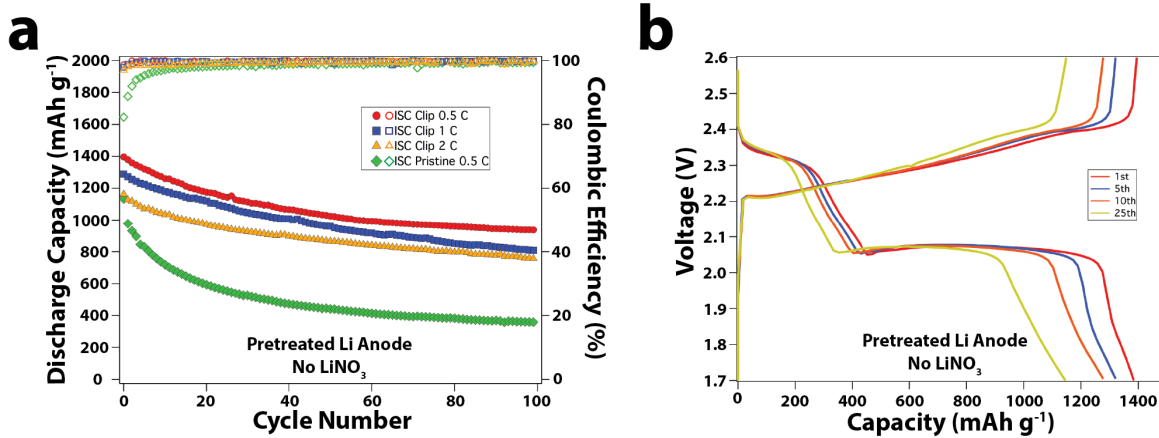

**Fig. S8: Electrochemical performances of clip coated separators with pretreated Li anode and ISC.** (a) Cycling performance of the pretreated Li anode Li-S cell with/without the clip coated separator and with ISC at three different C rates. (b) Discharge-charge voltage profiles of the pretreated Li anode Li-S cell with the clip coated separator and with ISC at 0.5 C. Note that  $\text{LiNO}_3$  is not present in the electrolyte.

**a**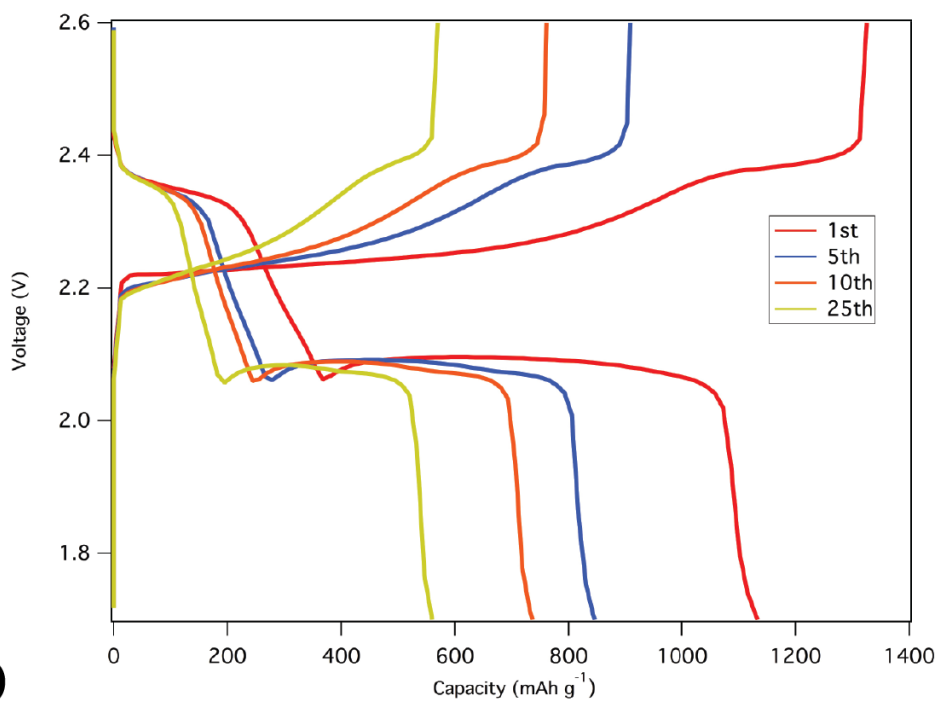**b**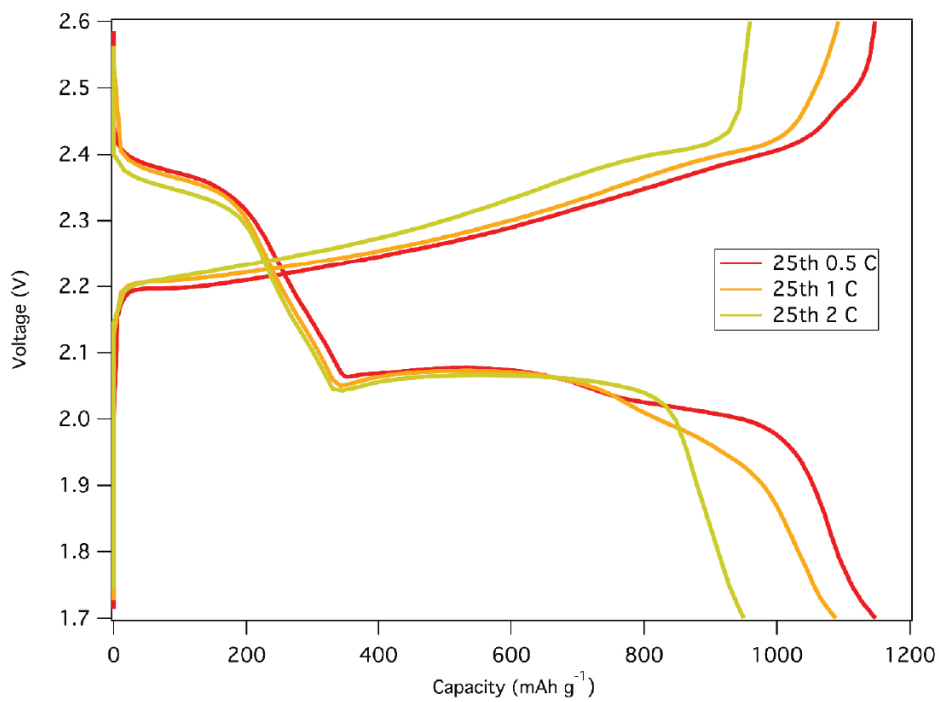

**Fig. S9:** Discharge-charge voltage profiles of clip coated separator Li-S cell with the pretreated Li anode and with ISC for (a) various cycles at 0.5C and (b) various C rates at 25<sup>th</sup> cycle.

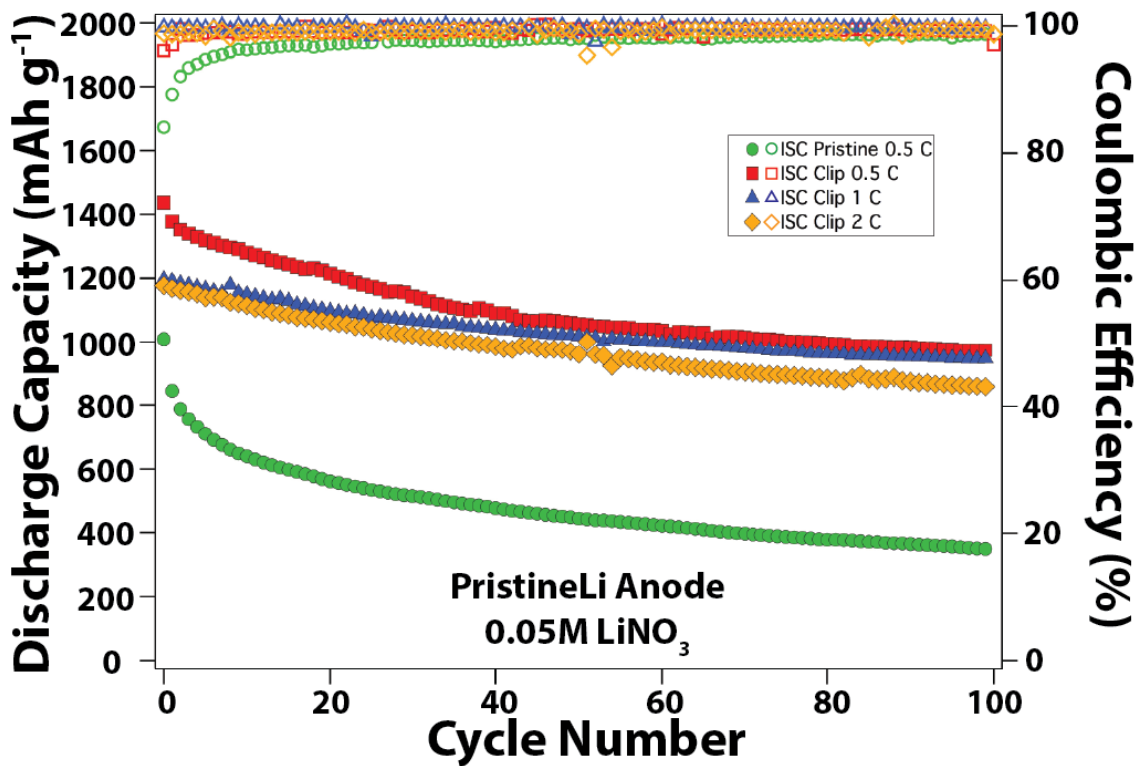

Fig. S10: Electrochemical performances of clip coated separators with pristine Li anode, ISC, and LiNO<sub>3</sub> in the electrolyte. Cycling performance of pristine Li anode of the Li-S cell with/without the clip coated separator and with ISC at three different C rates with 0.05M LiNO<sub>3</sub> in the electrolyte.

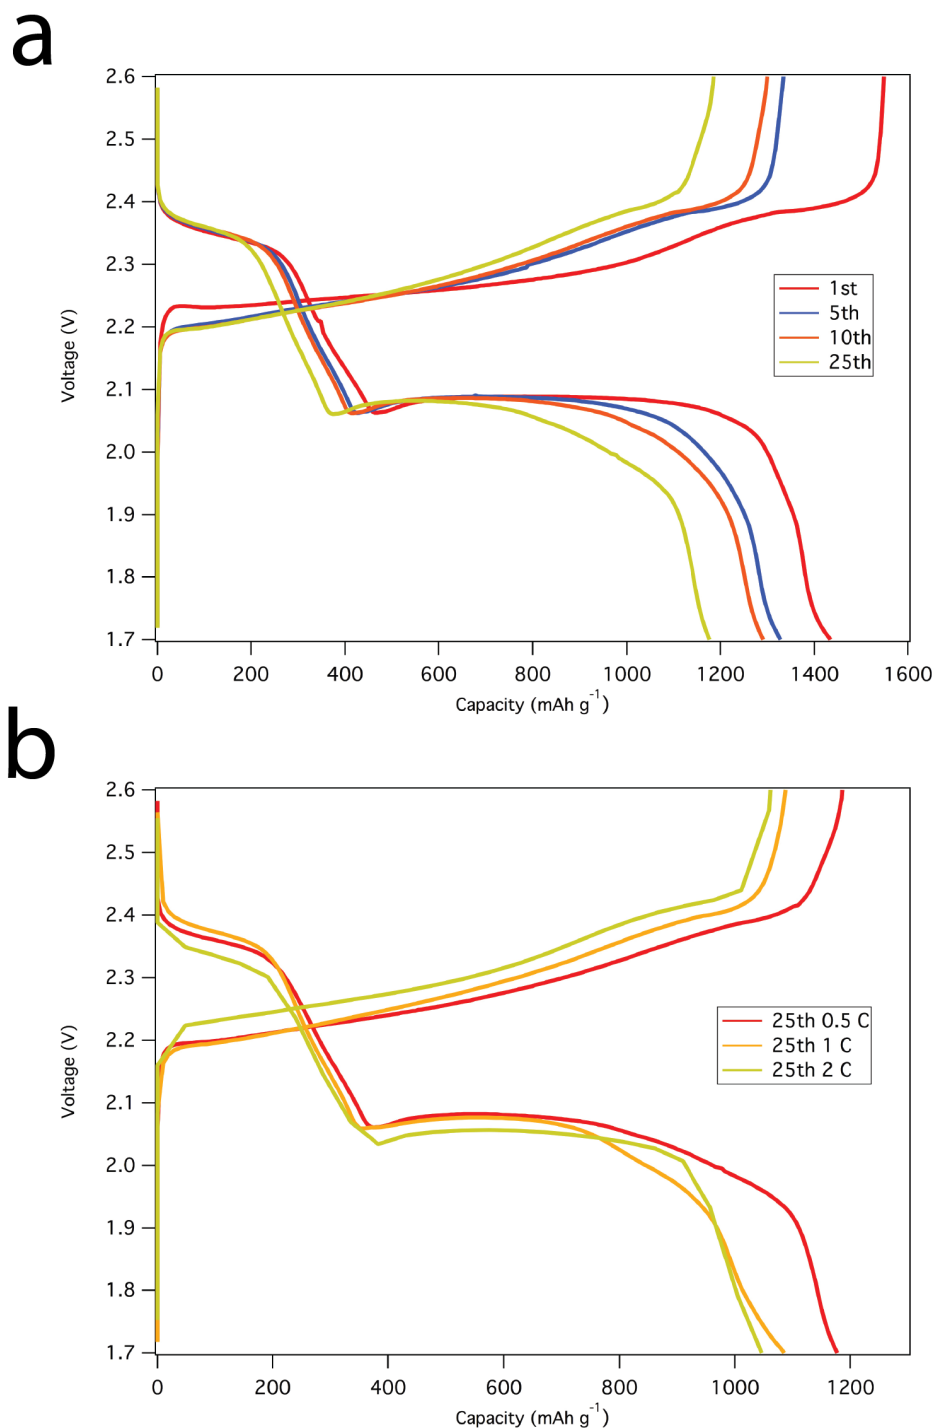

**Fig. S11: Cycling performance and voltage profiles of Li-S cells with clip coated separator, ISC, and 0.05M LiNO<sub>3</sub> in the electrolyte.** (a) Discharge-charge voltage profiles of clip coated separator Li-S cell with 0.05M LiNO<sub>3</sub> added in the electrolyte and with ISC for various cycles at 0.5 C. (b) Discharge-charge voltage profiles of the clip coated separator Li-S cell with 0.05M LiNO<sub>3</sub> in the electrolyte and with ISC at 25<sup>th</sup> cycle at various C rates.

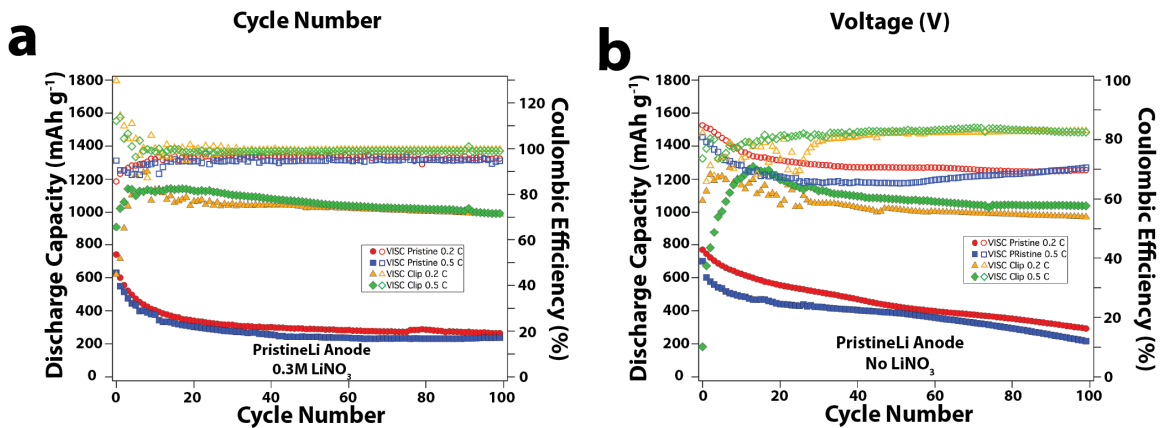

**Fig. S12: Electrochemical performances of clip coated separators with pristine Li anode, VISC, and with/without  $\text{LiNO}_3$  in the electrolyte.** (a) Cycling performance of the pristine Li anode Li-S cells with/without the clip coated separator, with VISC, and  $0.3\text{M LiNO}_3$  in the electrolyte at two different C rates. (b) Cycling performance of the pristine Li anode Li-S cells with/without the clip coated separator and with VISC at two different C rates without  $\text{LiNO}_3$  in the electrolyte.

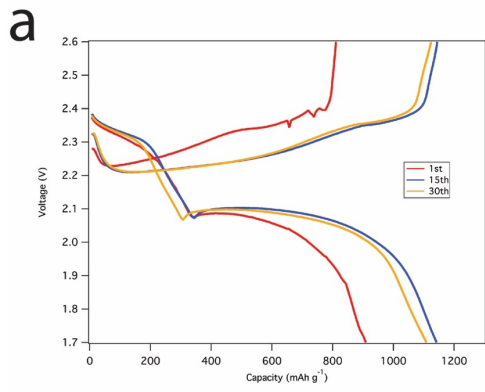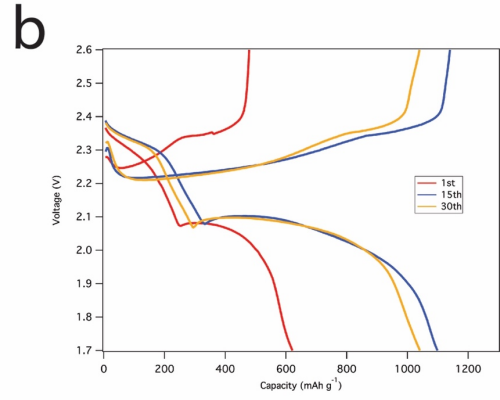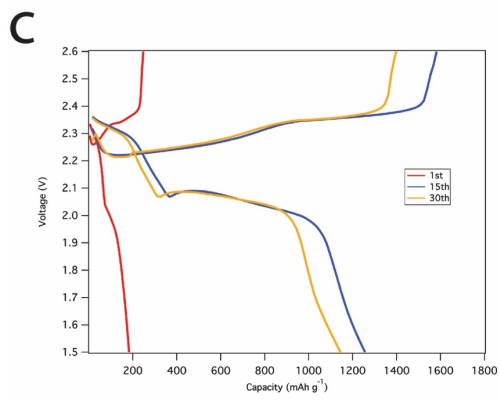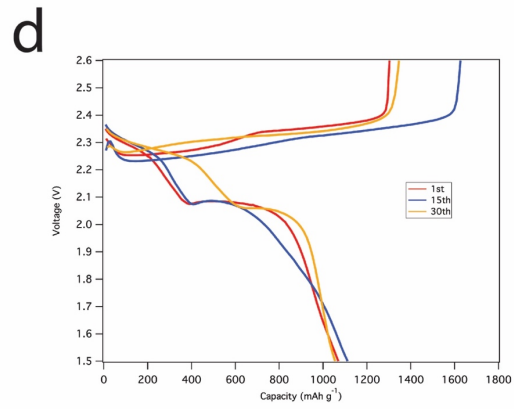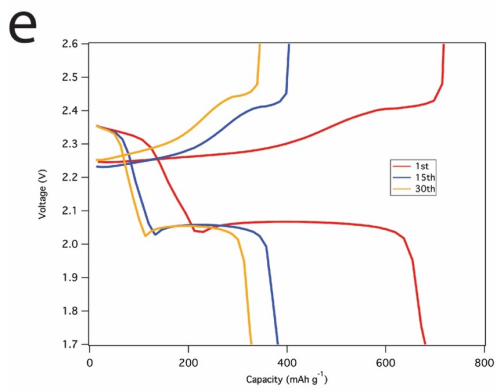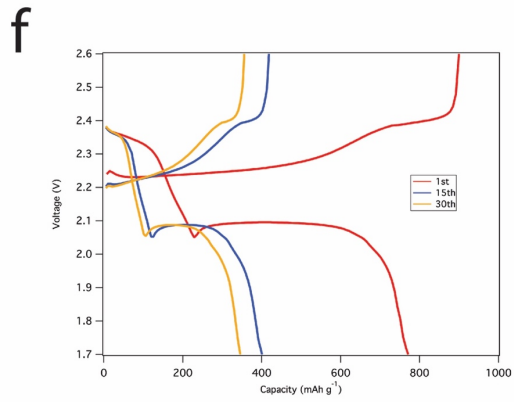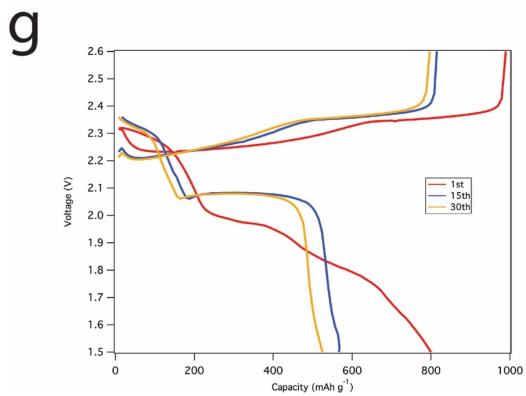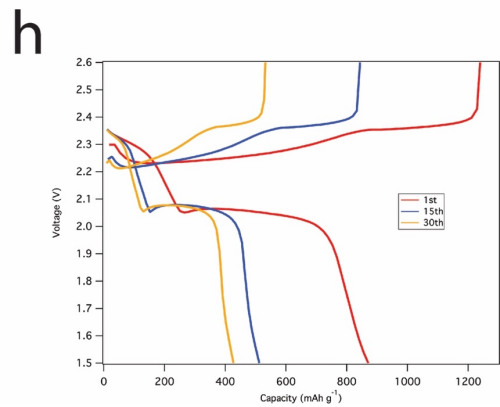

**Fig. S13: Voltage profiles of Li-S cells with clip coated separator and VISC.** (a) Discharge-charge voltage profiles of clip coated separator Li-S cell with VISC and 0.3M LiNO<sub>3</sub> added in the electrolyte for various cycles at 0.5 C. (b) Discharge-charge voltage profiles of clip coated separator Li-S cell with VISC and 0.3M LiNO<sub>3</sub> added in the electrolyte for various cycles at 0.2 C. (c) Discharge-charge voltage profiles of clip coated separator Li-S cell with VISC for various cycles at 0.5 C. (d) Discharge-charge voltage profiles of clip coated separator Li-S cell with VISC for various cycles at 0.2 C. (e) Discharge-charge voltage profiles of pristine separator Li-S cell with VISC and 0.3M LiNO<sub>3</sub> added in the electrolyte for various cycles at 0.5 C. (f) Discharge-charge voltage profiles of pristine separator Li-S cell with VISC and 0.3M LiNO<sub>3</sub> added in the electrolyte for various cycles at 0.2 C. (g) Discharge-charge voltage profiles of pristine separator Li-S cell with VISC for various cycles at 0.5 C. (h) Discharge-charge voltage profiles of pristine separator Li-S cell with VISC for various cycles at 0.2 C.

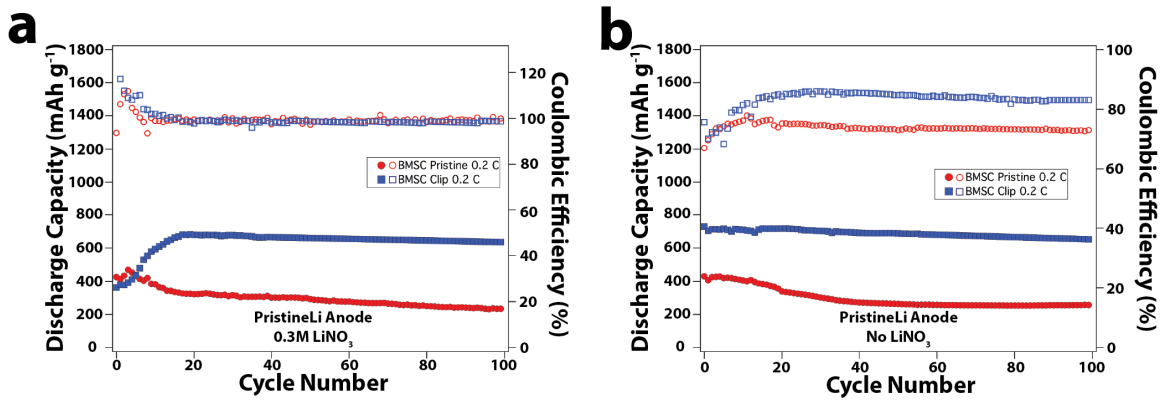

**Fig. S14: Electrochemical performances of clip coated separators with pristine Li anode, BMSC, and with/without LiNO<sub>3</sub> in the electrolyte.** (a) Cycling performance of the pristine Li anode Li-S cells with/without the clip coated separator, with BMSC, and 0.3M LiNO<sub>3</sub> in the electrolyte at 0.2 C. (b) Cycling performance of the pristine Li anode Li-S cells with/without the clip coated separator and with BMSC at 0.2 C without LiNO<sub>3</sub> in the electrolyte.

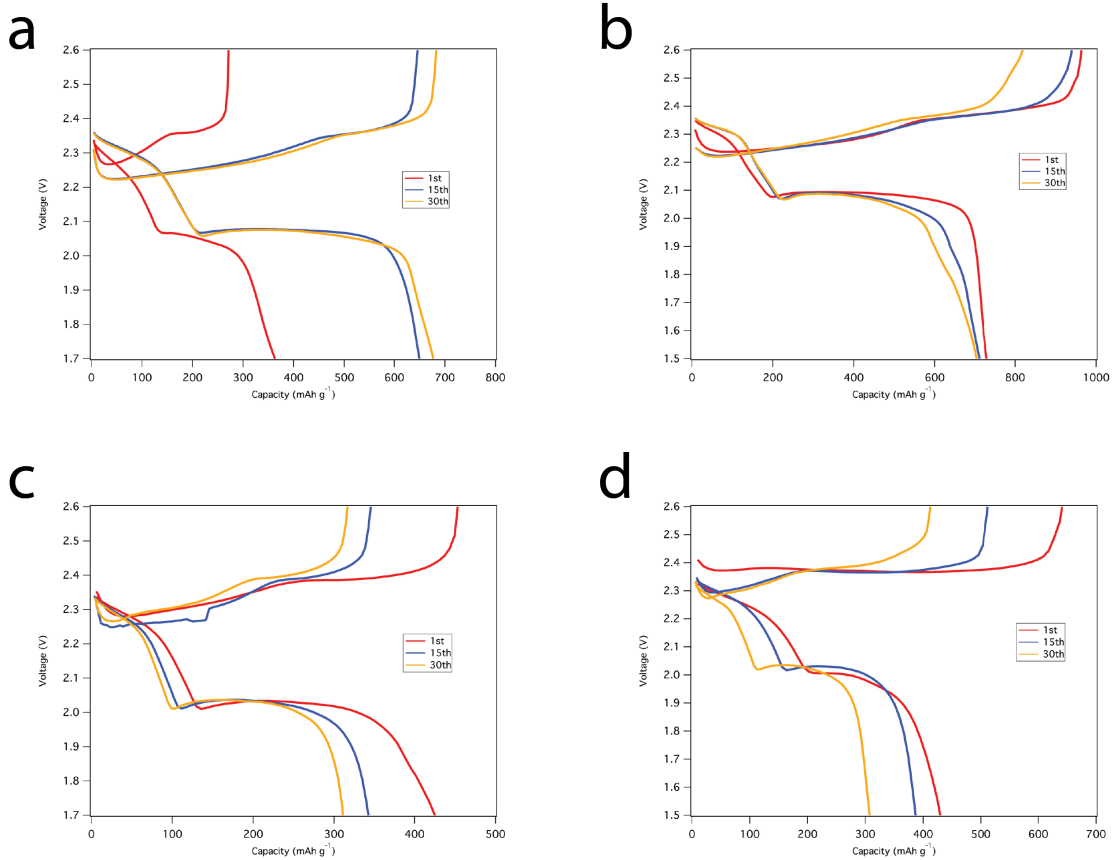

**Fig. S15: Voltage profiles of Li-S cells with clip coated separator and BMSC.** (a) Discharge-charge voltage profiles of clip coated separator Li-S cell with BMSC and 0.3M LiNO<sub>3</sub> added in the electrolyte for various cycles at 0.2 C. (b) Discharge-charge voltage profiles of clip coated separator Li-S cell with BMSC for various cycles at 0.2 C. (c) Discharge-charge voltage profiles of pristine separator Li-S cell with BMSC and 0.3M LiNO<sub>3</sub> added in the electrolyte for various cycles at 0.2 C. (d) Discharge-charge voltage profiles of pristine separator Li-S cell with BMSC for various cycles at 0.2 C.



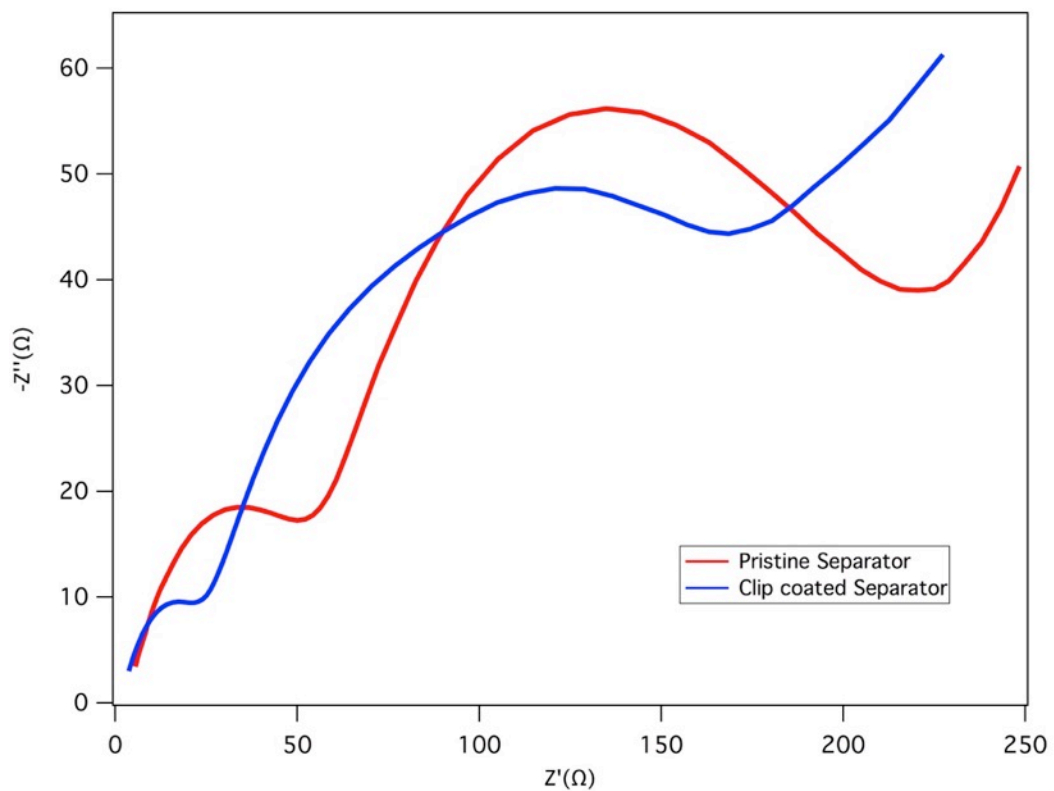

**Fig. S16: AC impedance spectroscopy analysis of the clip coated separator and pristine separator Li-S cells with ISC.**

| Separator | Anode         | Cathode | Electrolyte                                     | Cycle Number | C rate | Capacity (mAh g <sup>-1</sup> ) | CE (%) |
|-----------|---------------|---------|-------------------------------------------------|--------------|--------|---------------------------------|--------|
| Clip      | Li            | ISC     | 1M LiTFSI<br>DME:DOL                            | 100          | 0.5    | 1250                            | 90     |
| Clip      | Li            | ISC     | 1M LiTFSI<br>DME:DOL                            | 250          | 0.5    | 1180                            | 89     |
| Clip      | Li            | ISC     | 1M LiTFSI<br>DME:DOL                            | 100          | 1      | 1080                            | 91     |
| Clip      | Li            | ISC     | 1M LiTFSI<br>DME:DOL                            | 100          | 2      | 960                             | 91     |
| Pristine  | Li            | ISC     | 1M LiTFSI<br>DME:DOL                            | 100          | 0.5    | 340                             | 85     |
| Clip      | Pretreated Li | ISC     | 1M LiTFSI<br>DME:DOL                            | 100          | 0.5    | 1000                            | 99.9   |
| Clip      | Pretreated Li | ISC     | 1M LiTFSI<br>DME:DOL                            | 100          | 1      | 830                             | 99.9   |
| Clip      | Pretreated Li | ISC     | 1M LiTFSI<br>DME:DOL                            | 100          | 2      | 770                             | 99.8   |
| Pristine  | Pretreated Li | ISC     | 1M LiTFSI<br>DME:DOL                            | 100          | 0.5    | 350                             | 99.1   |
| Clip      | Li            | ISC     | 1M LiTFSI<br>DME:DOL<br>0.05M LiNO <sub>3</sub> | 100          | 0.5    | 1000                            | 98.5   |
| Clip      | Li            | ISC     | 1M LiTFSI<br>DME:DOL<br>0.05M LiNO <sub>3</sub> | 100          | 1      | 980                             | 99.1   |
| Clip      | Li            | ISC     | 1M LiTFSI<br>DME:DOL<br>0.05M LiNO <sub>3</sub> | 100          | 2      | 870                             | 99.3   |
| Pristine  | Li            | ISC     | 1M LiTFSI<br>DME:DOL<br>0.05M LiNO <sub>3</sub> | 100          | 0.5    | 348                             | 98.3   |
| Clip      | Li            | VISC    | 1M LiTFSI<br>DME:DOL                            | 100          | 0.2    | 1000                            | 82     |
| Pristine  | Li            | VISC    | 1M LiTFSI<br>DME:DOL                            | 100          | 0.2    | 290                             | 69     |
| Clip      | Li            | VISC    | 1M LiTFSI<br>DME:DOL                            | 100          | 0.5    | 1060                            | 83     |
| Pristine  | Li            | VISC    | 1M LiTFSI<br>DME:DOL                            | 100          | 0.5    | 220                             | 70     |
| Clip      | Li            | VISC    | 1M LiTFSI<br>DME:DOL                            | 250          | 0.5    | 1010                            | 82     |
| Clip      | Li            | VISC    | 1M LiTFSI<br>DME:DOL<br>0.3M LiNO <sub>3</sub>  | 100          | 0.2    | 1105                            | 99.5   |
| Pristine  | Li            | VISC    | 1M LiTFSI<br>DME:DOL<br>0.3M LiNO <sub>3</sub>  | 100          | 0.2    | 300                             | 95.6   |
| Clip      | Li            | VISC    | 1M LiTFSI<br>DME:DOL<br>0.3M LiNO <sub>3</sub>  | 100          | 0.5    | 1100                            | 99.6   |
| Pristine  | Li            | VISC    | 1M LiTFSI<br>DME:DOL<br>0.3M LiNO <sub>3</sub>  | 100          | 0.5    | 270                             | 94.9   |

|                  |    |      |                                                |     |     |      |      |
|------------------|----|------|------------------------------------------------|-----|-----|------|------|
| Clip             | Li | BMSC | 1M LiTFSI<br>DME:DOL                           | 100 | 0.2 | 660  | 85   |
| Pristine         | Li | BMSC | 1M LiTFSI<br>DME:DOL                           | 100 | 0.2 | 260  | 73   |
| Clip             | Li | BMSC | 1M LiTFSI<br>DME:DOL<br>0.3M LiNO <sub>3</sub> | 100 | 0.2 | 640  | 98.4 |
| Pristine         | Li | BMSC | 1M LiTFSI<br>DME:DOL<br>0.3M LiNO <sub>3</sub> | 100 | 0.2 | 230  | 99.3 |
|                  |    |      |                                                |     |     |      |      |
| MWCNT<br>(10LR)  | Li | ISC  | 1M LiTFSI<br>DME:DOL                           | 100 | 0.5 | 960  | 84   |
| MWCNT<br>(7LR)   | Li | ISC  | 1M LiTFSI<br>DME:DOL                           | 100 | 0.5 | 830  | 81   |
| MWCNT<br>(5LR)   | Li | ISC  | 1M LiTFSI<br>DME:DOL                           | 100 | 0.5 | 790  | 83.2 |
| MWCNT<br>(3LR)   | Li | ISC  | 1M LiTFSI<br>DME:DOL                           | 100 | 0.5 | 710  | 83   |
| MWCNT<br>(1LR)   | Li | ISC  | 1M LiTFSI<br>DME:DOL                           | 100 | 0.5 | 330  | 83   |
|                  |    |      |                                                |     |     |      |      |
| KB<br>(10LR)     | Li | ISC  | 1M LiTFSI<br>DME:DOL                           | 100 | 0.5 | 1130 | 80   |
| KB<br>(7LR)      | Li | ISC  | 1M LiTFSI<br>DME:DOL                           | 100 | 0.5 | 1030 | 85   |
| KB<br>(5LR)      | Li | ISC  | 1M LiTFSI<br>DME:DOL                           | 100 | 0.5 | 850  | 87   |
| KB<br>(3LR)      | Li | ISC  | 1M LiTFSI<br>DME:DOL                           | 100 | 0.5 | 590  | 85   |
| KB<br>(1LR)      | Li | ISC  | 1M LiTFSI<br>DME:DOL                           | 100 | 0.5 | 460  | 86   |
|                  |    |      |                                                |     |     |      |      |
| SP<br>(10LR)     | Li | ISC  | 1M LiTFSI<br>DME:DOL                           | 100 | 0.5 | 960  | 83   |
| SP<br>(7LR)      | Li | ISC  | 1M LiTFSI<br>DME:DOL                           | 100 | 0.5 | 830  | 85   |
| SP<br>(5LR)      | Li | ISC  | 1M LiTFSI<br>DME:DOL                           | 100 | 0.5 | 760  | 81   |
| SP<br>(3LR)      | Li | ISC  | 1M LiTFSI<br>DME:DOL                           | 100 | 0.5 | 510  | 85   |
| SP<br>(1LR)      | Li | ISC  | 1M LiTFSI<br>DME:DOL                           | 100 | 0.5 | 480  | 88   |
|                  |    |      |                                                |     |     |      |      |
| Silica<br>(10LR) | Li | ISC  | 1M LiTFSI<br>DME:DOL                           | 100 | 0.2 | 780  | 93   |
| Silica<br>(7LR)  | Li | ISC  | 1M LiTFSI<br>DME:DOL                           | 100 | 0.2 | 550  | 91   |
| Silica<br>(5LR)  | Li | ISC  | 1M LiTFSI<br>DME:DOL                           | 100 | 0.2 | 480  | 89   |
| Silica<br>(3LR)  | Li | ISC  | 1M LiTFSI<br>DME:DOL                           | 100 | 0.2 | 380  | 89   |
| Silica<br>(1LR)  | Li | ISC  | 1M LiTFSI<br>DME:DOL                           | 100 | 0.2 | 330  | 88   |

**Table S1: LiS electrochemical performance summary table.**
